# Supplementary material
Source: publisher figshare collection journal article supplement (https://frontiersin.figshare.com/ndownloader/files/24382301)
Supplement: Supplementary file [file 24382301]

**Table S7.** Sex-biased differentially-expressed genes in both larvae and gonads

| DE in<br>larvae<br>group | Gonads                                                                                                                                                            |                                                                                                                                                                                          |
|--------------------------|-------------------------------------------------------------------------------------------------------------------------------------------------------------------|------------------------------------------------------------------------------------------------------------------------------------------------------------------------------------------|
|                          | Female                                                                                                                                                            | Male                                                                                                                                                                                     |
| A                        | WASP Family Member 1<br>( <i>WASF1</i> ),<br>Ataxin 2 Like ( <i>ATX2L</i> )                                                                                       | WD repeat domain 90 ( <i>WDR90</i> ),<br>AKT Serine/Threonine Kinase 2<br>( <i>AKT2</i> ),<br>Obscurin Like 1( <i>OBSL1</i> ),<br>ADP Ribosylation Factor 1<br>( <i>ARF1</i> ) isoform 2 |
| B                        | Neural cell adhesion<br>molecule L1 like ( <i>NCHL1</i> ),<br>ADP Ribosylation Factor 1<br>( <i>ARF1</i> ) isoform 1,<br>DAB Adaptor Protein 2<br>( <i>DAB2</i> ) | family with sequence similarity<br>198 member A ( <i>FAM198A</i> ),<br>Microtubule Actin Crosslinking<br>Factor 1 ( <i>MACF1</i> )                                                       |
